# Supplementary material
Source: PubMed Central journal article supplement (PMC7700899)
Supplement: mmc3.pdf [file mmc3.pdf]

15 September, 2020

**A case-control and cohort study to determine the relationship between ethnic background and severe COVID-19 by Zakeri et al (Corresponding author Ajay M Shah).**

This is to confirm that I am happy to be named in the acknowledgements section of the above manuscript.

Yours sincerely

A handwritten signature in black ink, appearing to read 'Clive Kay', with a stylized, cursive script.

Professor Clive Kay

15 September, 2020

**A case-control and cohort study to determine the relationship between ethnic background and severe COVID-19 by Zakeri et al (Corresponding author Ajay M Shah).**

This is to confirm that I am happy to be named in the acknowledgements section of the above manuscript.

Yours sincerely

A handwritten signature in purple ink that reads "Julia Wendon." The signature is written in a cursive style with a large initial 'J'.

Professor Julia Wendon

15 September, 2020

**A case-control and cohort study to determine the relationship between ethnic background and severe COVID-19 by Zakeri et al (Corresponding author Ajay M Shah).**

This is to confirm that I am happy to be named in the acknowledgements section of the above manuscript.

Yours sincerely

A handwritten signature in black ink, appearing to read 'Irene', with a long, sweeping horizontal flourish extending to the right.

Professor Irene Higginson

15 September, 2020

**A case-control and cohort study to determine the relationship between ethnic background and severe COVID-19 by Zakeri et al (Corresponding author Ajay M Shah).**

This is to confirm that I am happy to be named in the acknowledgements section of the above manuscript.

Yours sincerely

A handwritten signature in black ink, appearing to read 'Alastair Baker', with a stylized flourish at the end.

Professor Alastair Baker

15 September, 2020

**A case-control and cohort study to determine the relationship between ethnic background and severe COVID-19 by Zakeri et al (Corresponding author Ajay M Shah).**

This is to confirm that I am happy to be named in the acknowledgements section of the above manuscript.

Yours sincerely

Chris Fry

Dominic Thurgood

A handwritten signature in black ink, appearing to be 'DT' or similar initials, enclosed within a circular scribble.

Isuf Ali

A handwritten signature in black ink, appearing to be 'Isuf' or similar, written in a cursive style.



15 September, 2020

**A case-control and cohort study to determine the relationship between ethnic background and severe COVID-19 by Zakeri et al (Corresponding author Ajay M Shah).**

This is to confirm that I am happy to be named in the acknowledgements section of the above manuscript.

Yours sincerely

A handwritten signature in black ink, appearing to read 'Chris Fry', with a stylized, cursive script.

Chris Fry

Dominic Thurgood

Isuf Ali
